# Supplementary material for: Biochar and Cd Alter the Degradation and Transport of Kasugamycin in Soil and Spinach
Source: MDPI journal article supplement (doi:10.3390/agriculture13112172), 2023-11-20
Supplement: s1 [file s1]

## Supplementary information

# Biochar and Cd Alter the Degradation and Transport of Kasugamycin in Soil and Spinach

Liqiang Cui <sup>1,2,†</sup>, Jingwen Ma <sup>1,2,†</sup>, Guixiang Quan <sup>1,2</sup>, Jinlong Yan <sup>1,2,\*</sup>, James A. Ippolito <sup>3</sup> and Hui Wang <sup>1,2</sup>

<sup>1</sup> School of Environmental Science and Engineering, Yancheng Institute of Technology, No. 211 Jianjun East Road, Yancheng 224051, China; lqcui@ycit.cn (L.C.); 18351278031@163.com (J.M.); qgx@ycit.cn (G.Q.); whsl@ycit.cn (H.W.)

<sup>2</sup> Jiangsu Engineering Research Center of Biomass Waste Pyrolytic Carbonization & Application, Yancheng 224051, China

<sup>3</sup> School of Environment and Natural Resources, The Ohio State University, 2021 Coffey Road, Columbus, OH 4321, USA; ippolito.38@osu.edu

\* Correspondence: jylyt@ycit.cn

† These authors contributed equally to this work

## Methods for Supplementary data

Plant total Cd concentration: A 0.50 g plant sample was placed in a 100 mL beaker and predigested overnight, at room temperature, in a 10 mL solution of concentrated HNO<sub>3</sub> and HClO<sub>4</sub> (4:1, v:v). The following day, the beakers were placed on an electric heating plate, the temperature raised from 100 to 200 °C over 30 min, and then the temperature was increased to 250 °C until the solution changed to colorless and ~ 2 mL of solution remained. The solutions were then removed, cooled, brought to a 25 mL final volume, and filtered through a 0.45 µm membrane filter. The Cd concentration in the digestate was determined with Atomic Absorption Spectrophotometry (AAS, TAS-986, Persee, China).

Soil available Cd concentration: A 5.000 g soil sample was mixed with 10 mL of 0.005 mol L<sup>-1</sup> DTPA (pH=7.3) in 50 ml centrifuge tube, by shaking at 180 r min<sup>-1</sup> for 2 h at room temperature. Afterwards, the tubes were centrifuged to separate the liquid

from solid phase, and liquid was filtered through a 0.45  $\mu\text{m}$  membrane filter. The Cd concentration in the filtrate was determined with Atomic Absorption Spectrophotometry (AAS) (TAS-986, Persee, China).

**X-ray Photoelectron Spectroscopy (XPS).** XPS was used to analyze surface properties in approximately 10 nm depth of biochars. XPS measurements were conducted using an ESCALAB 250Xi (THERMO FISHER, USA), equipped with a focused monochromatized Al K $\alpha$  radiation ( $h\nu = 1486.6$  eV). The X-ray spot size was 500  $\mu\text{m}$ . Survey scan spectra in the 1351 – 0 eV binding energy range were recorded with a pass energy of 100.0 eV, others in 20.0 eV.

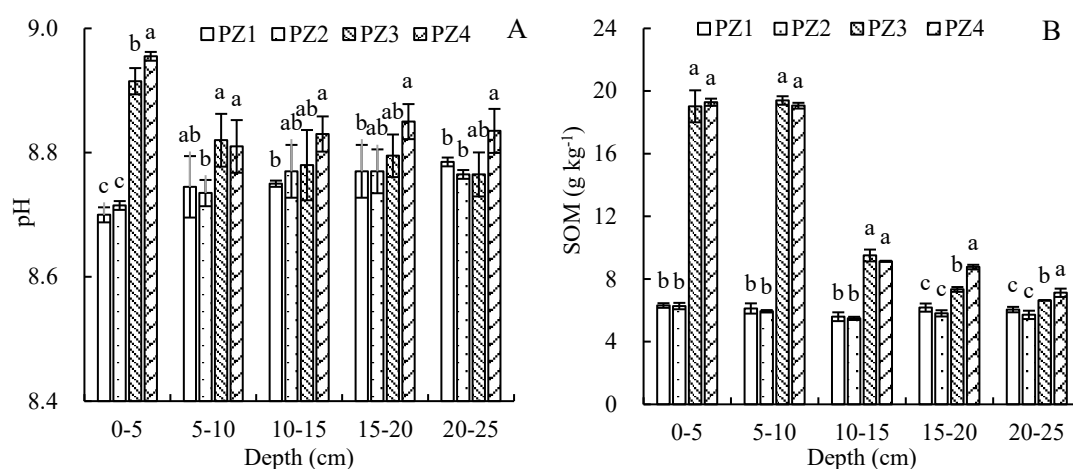

**Figure S1.** Changes in soil A) pH and B) soil organic matter (SOM) as a function of depth at the end of the study (28 days after KSM application). Treatment PZ1 = 10 mg KSM m<sup>-2</sup> was sprayed on spinach leaves in unamended soil; PZ2 = 20 mg Cd kg<sup>-1</sup> containing soil added to an unamended soil surface, and 10 mg KSM m<sup>-2</sup> sprayed on spinach leaves; PZ3 = 5% biochar amended soil (wt:wt), and 10 mg KSM m<sup>-2</sup> sprayed on spinach leaves; and PZ4 = 20 mg Cd kg<sup>-1</sup> containing soil added to the surface of a 5% biochar amended soil (wt:wt), and 10 mg KSM m<sup>-2</sup> sprayed on spinach leaves.

Different lower-case letters above error bars (error bars: the standard deviation of the mean;  $n = 3$ ;  $p < 0.05$ , determined via a Tukey post-hoc test) indicate statistically significant differences between treatments within a specific soil depth.

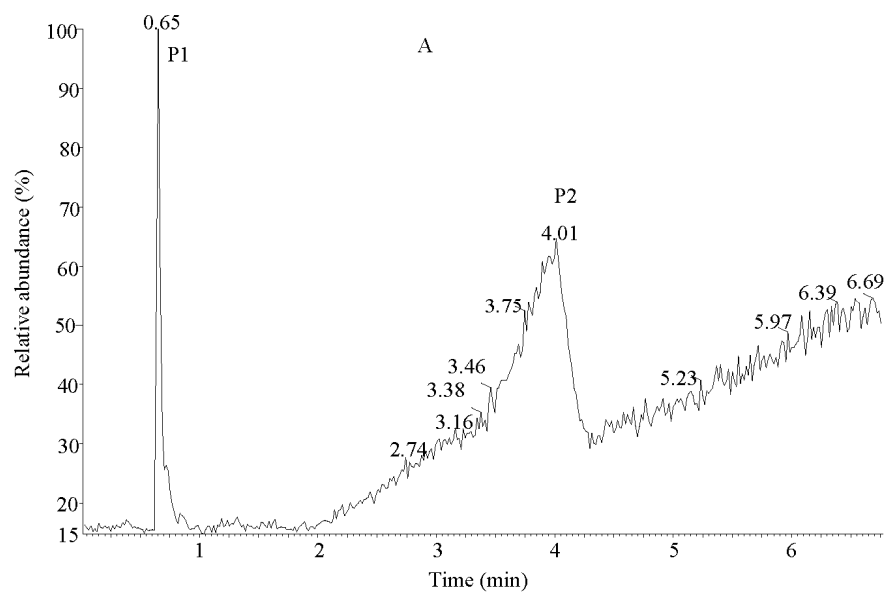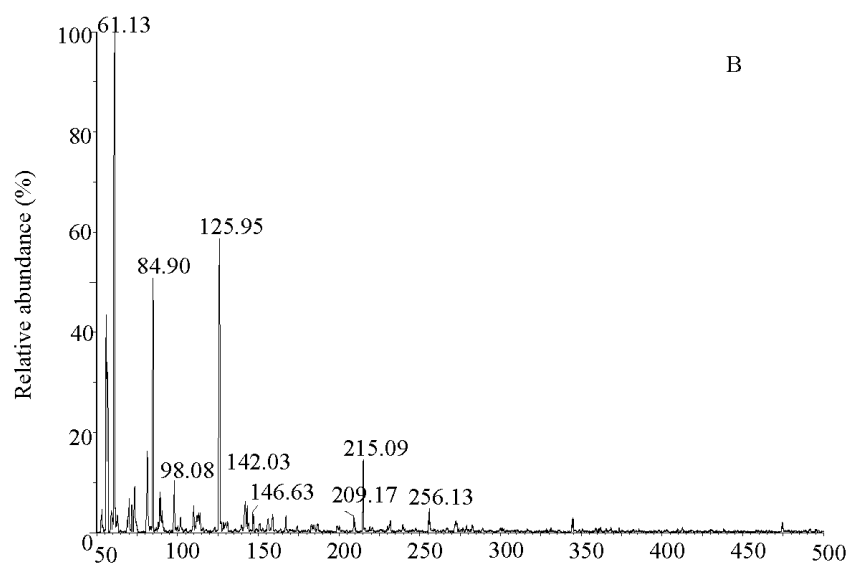

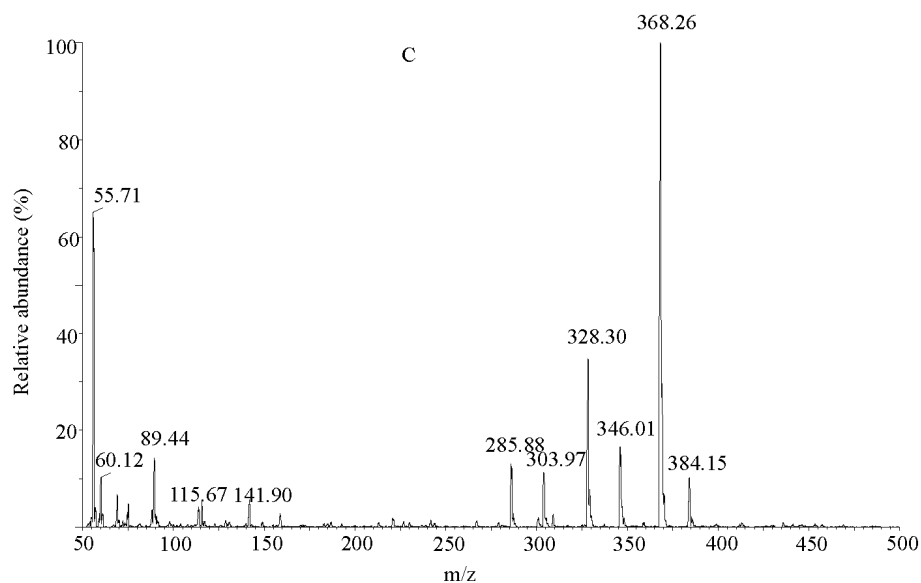

**Figure S2.** Chromatogram of soil KSM and degradation products after 1 day following treatment (PZ4; 20 mg Cd kg<sup>-1</sup> containing soil added to the surface of a 5% biochar amended soil (wt:wt), and 10 mg KSM m<sup>-2</sup> sprayed on spinach leaves) full-scan mass spectra(A: full-scan mass spectra; B: the peak P1 of A; C: the peak P2 of A).

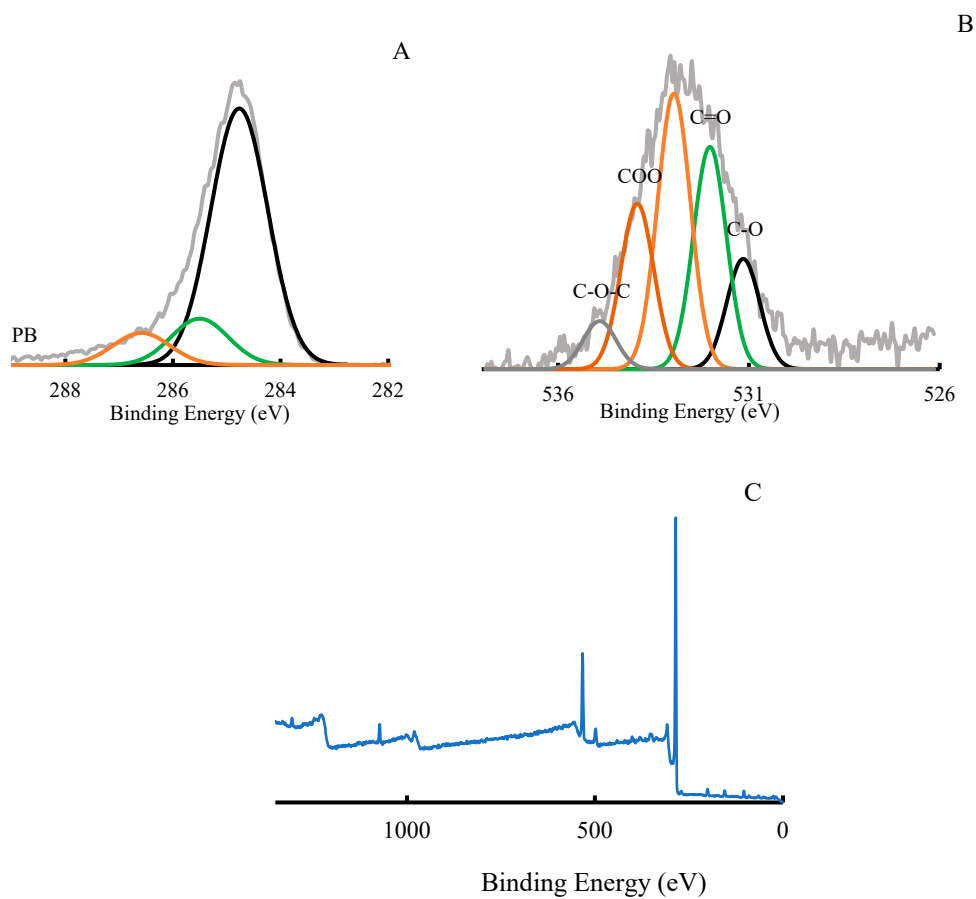

**Figure S3** XPS peak fits of C1s (A), O1s and (B) and maps (C) from biochar.

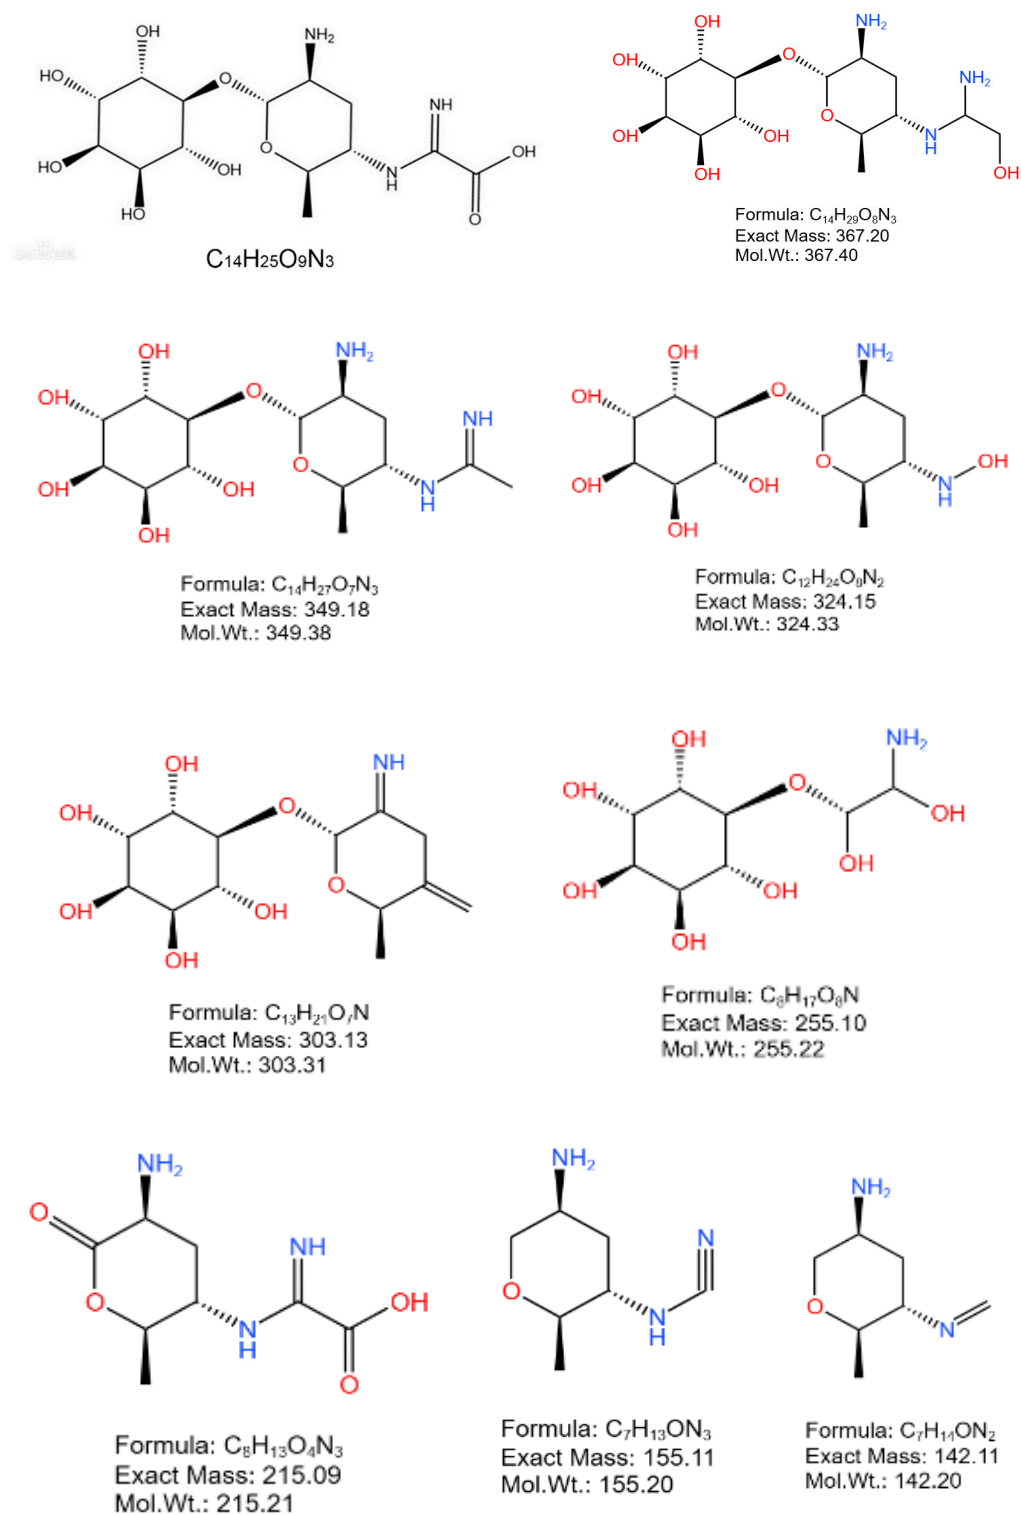

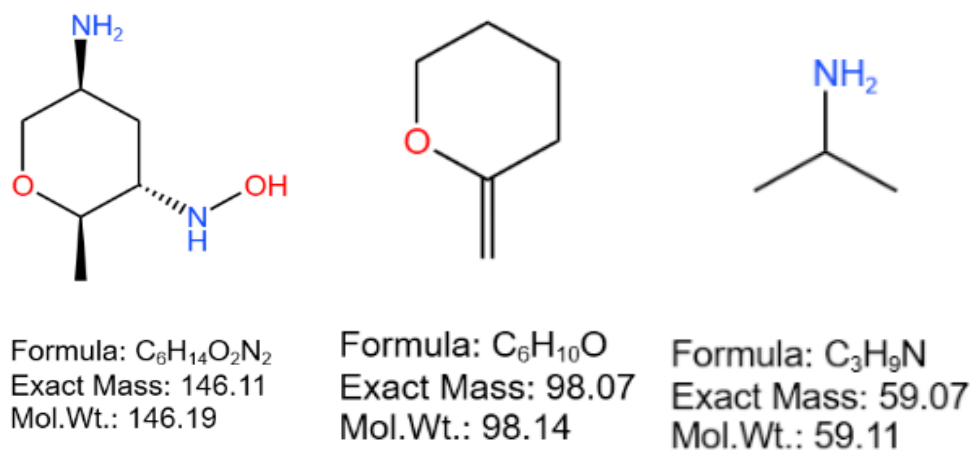

**Figure S4.** Possible KSM degradation products.

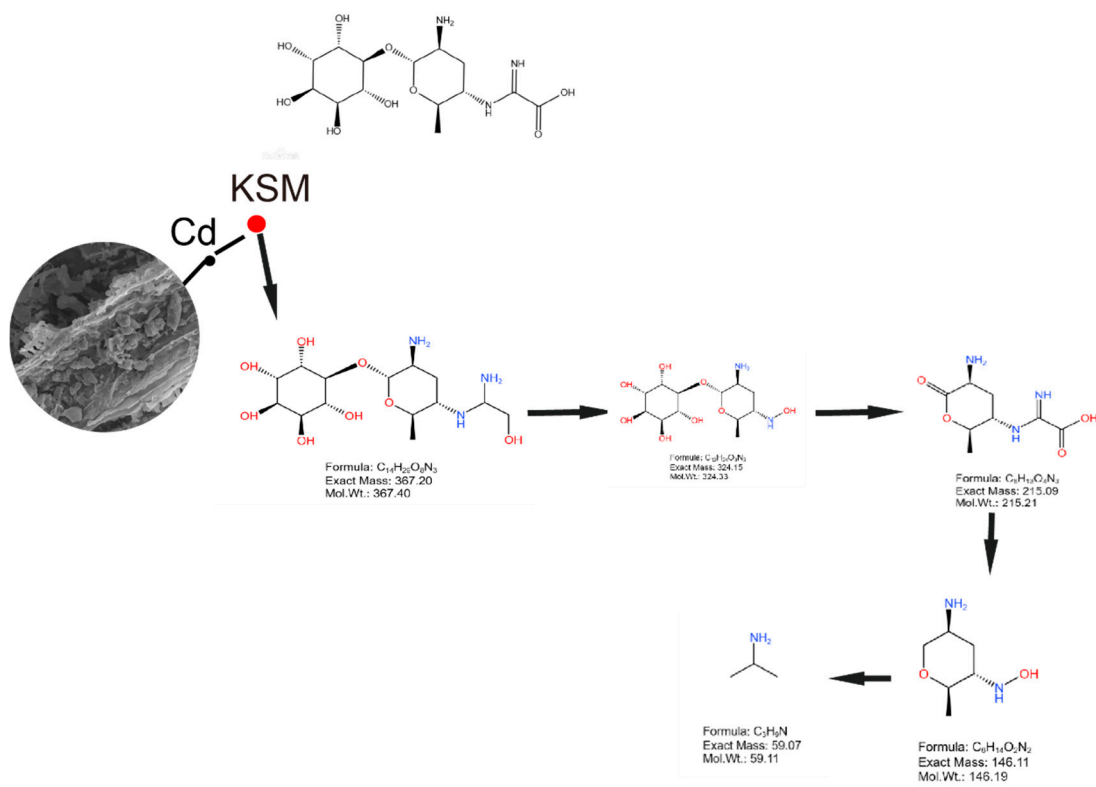

**Figure S5** Possible KSM degradation routes.

**Table S1.** Total mean Cd concentration in spinach leaves and roots (mg kg<sup>-1</sup> ± standard deviation of the mean). Treatment PZ2 did not receive biochar, while treatment PZ4 received 5% biochar application to soil. n = 3; p < 0.05, determined via a Tukey post-hoc test.

| Treatment | Spinach leaf  | Spinach root  |
|-----------|---------------|---------------|
| PZ2       | 30.75 ± 0.31a | 37.85 ± 0.05a |
| PZ4       | 25.47 ± 1.75b | 35.80 ± 0.13b |

**Table S2.** Soil bioavailable Cd concentrations with depth (DTPA, mg kg<sup>-1</sup> ± standard deviation of the mean). Treatment PZ2 did not receive biochar, while treatment PZ4 received 5% biochar application to soil. n = 3; p < 0.05, determined via a Tukey post-hoc test.

| Depth (cm) | 0-5          | 5-10         | 10-15        | 15-20        | 20-25        |
|------------|--------------|--------------|--------------|--------------|--------------|
| PZ2        | 1.00 ± 0.13a | 0.54 ± 0.04a | 0.14 ± 0.02a | 0.06 ± 0.01a | 0.05 ± 0.01a |
| PZ4        | 0.90 ± 0.07a | 0.28 ± 0.03b | 0.01 ± 0.01b | 0.05 ± 0.01a | 0.01 ± 0.00b |

**Table S3.** Band assignments in FTIR spectra of biochar.

| Bands (cm <sup>-1</sup> ) | Assignments                                   |
|---------------------------|-----------------------------------------------|
| 3400-3320                 | -OH stretching                                |
| 3000-2800                 | Aliphatic CH stretching                       |
| 1630-1700                 | Aromatic carbonyl/carboxyl C=O/C=C stretching |
| 1430-1420                 | Aromatic C=C stretching                       |
| 1000-1157                 | C-O-C                                         |
| 840-880                   | Glucoside CH <sub>2</sub> deformation         |
| 750-820                   | Aromatic rings                                |
| 460-470                   | Si-O                                          |

**Table S4.** Band assignments in:

|                             | Different<br>time pH | Different<br>depth pH | Different<br>time SOC | Different<br>depth SOC | Root<br>biomass | Shoot<br>biomass | Different time<br>Soil KSM | Plant root<br>KSM | Plant shoot<br>KSM | Different soil<br>depth KSM | Total Cd |
|-----------------------------|----------------------|-----------------------|-----------------------|------------------------|-----------------|------------------|----------------------------|-------------------|--------------------|-----------------------------|----------|
| Different time pH           | 1.000                | 0.597**               | .827**                | 0.363                  | 0.833           | 0.961*           | -0.631                     | -0.907            | -0.988             | -0.828                      | -0.287   |
| Different depth<br>pH       | 0.597**              | 1.000                 | 0.429                 | 0.665**                | 0.766           | 0.801            | -0.496                     | -0.910            | -0.685             | -0.573                      | -0.444   |
| Different time<br>SOC       | 0.827**              | 0.429                 | 1.000                 | 0.252                  | -0.674          | -0.788           | -0.299                     | 0.617             | 0.890              | -0.732                      | 0.523    |
| Different depth<br>SOC      | 0.363                | 0.665**               | 0.252                 | 1.000                  | -0.372          | -0.595           | -0.577                     | 0.537             | 0.729              | -0.349                      | 0.856**  |
| Root biomass                | 0.833                | 0.766                 | -0.674                | -0.372                 | 1.000           | 0.947            | -0.775                     | -0.798            | -0.900             | -0.674                      | -0.660   |
| Shoot biomass               | 0.961*               | 0.801                 | -0.788                | -0.595                 | 0.947           | 1.000            | -0.926                     | -0.925            | -0.982             | -0.859                      | -0.826   |
| Different time<br>Soil KSM  | -0.631               | -0.496                | -0.299                | -0.577                 | -0.775          | -0.926           | 1.000                      | 0.874             | 0.972*             | 0.412                       | 0.011    |
| Plant root KSM              | -0.907               | -0.910                | 0.617                 | 0.537                  | -0.798          | -0.925           | 0.874                      | 1.000             | 0.882              | 0.979*                      | 0.735    |
| Plant shoot KSM             | -0.988               | -0.685                | 0.890                 | 0.729                  | -0.900          | -0.982           | 0.972*                     | 0.882             | 1.000              | 0.837                       | 0.915    |
| Different soil<br>depth KSM | -0.828               | -0.573                | -0.732                | -0.349                 | -0.674          | -0.859           | 0.412                      | 0.979*            | 0.837              | 1.000                       | 0.702*   |
| Total Cd                    | -0.287               | -0.444                | 0.523                 | 0.856**                | -0.660          | -0.826           | 0.011                      | 0.735             | 0.915              | 0.702*                      | 1.000    |

\*\* The correlation is significant at a  $p < 0.01$ .

\* The correlation is significant at a  $p < 0.05$ .
